# Supplementary material for: Cellulose nanofibril core–shell silica coatings and their conversion into thermally stable nanotube aerogels
Source: Royal Society of Chemistry journal article supplement (doi:10.1039/c5ta03646a), 2015-01-01
Supplement: c5ta03646a1.pdf [file c5ta03646a1.pdf]

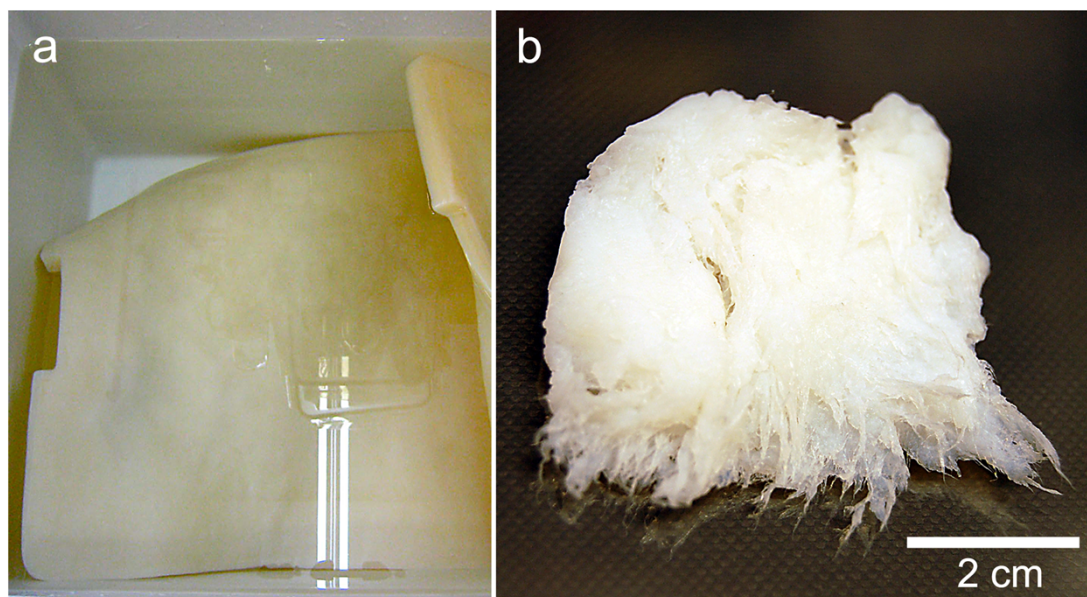

Fig. S1. The 1 kg bacterial cellulose pellicle mat as grown at removal of growth medium (before shredding) (a), the shredded mat before acid hydrolysis (b).

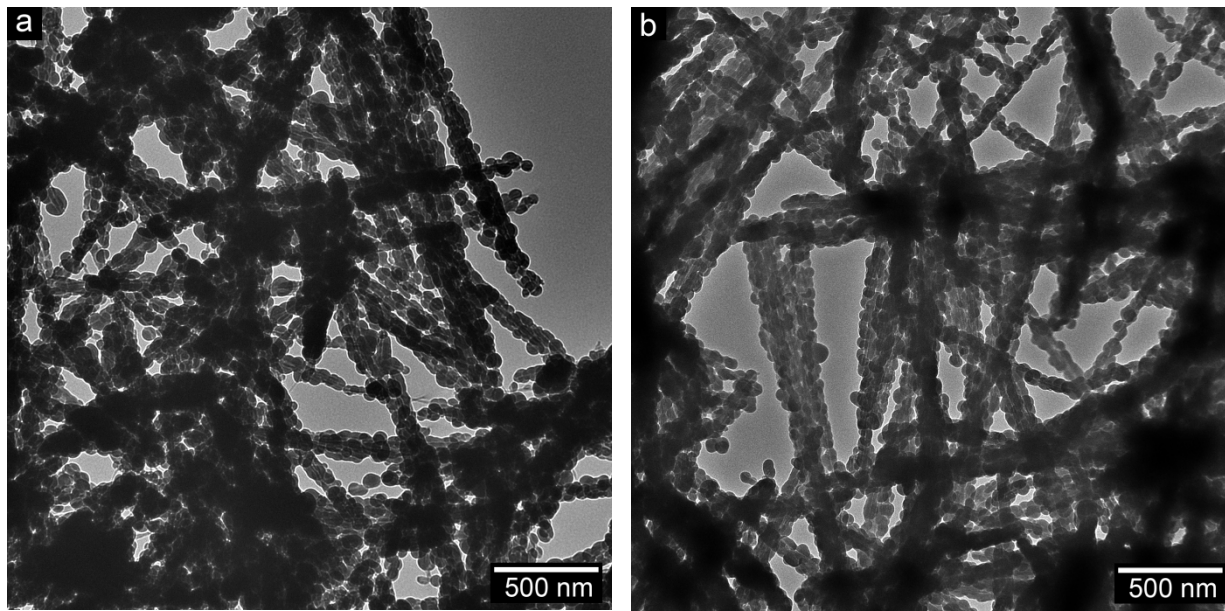

Fig. S2. Effect of ammonia concentration in 1 mg/mL CNF coating reactions, (a) Low ammonia concentration (0.28 mL, half of the reference concentration), (b) High ammonia concentration (1.14 mL, twice of the reference concentration)

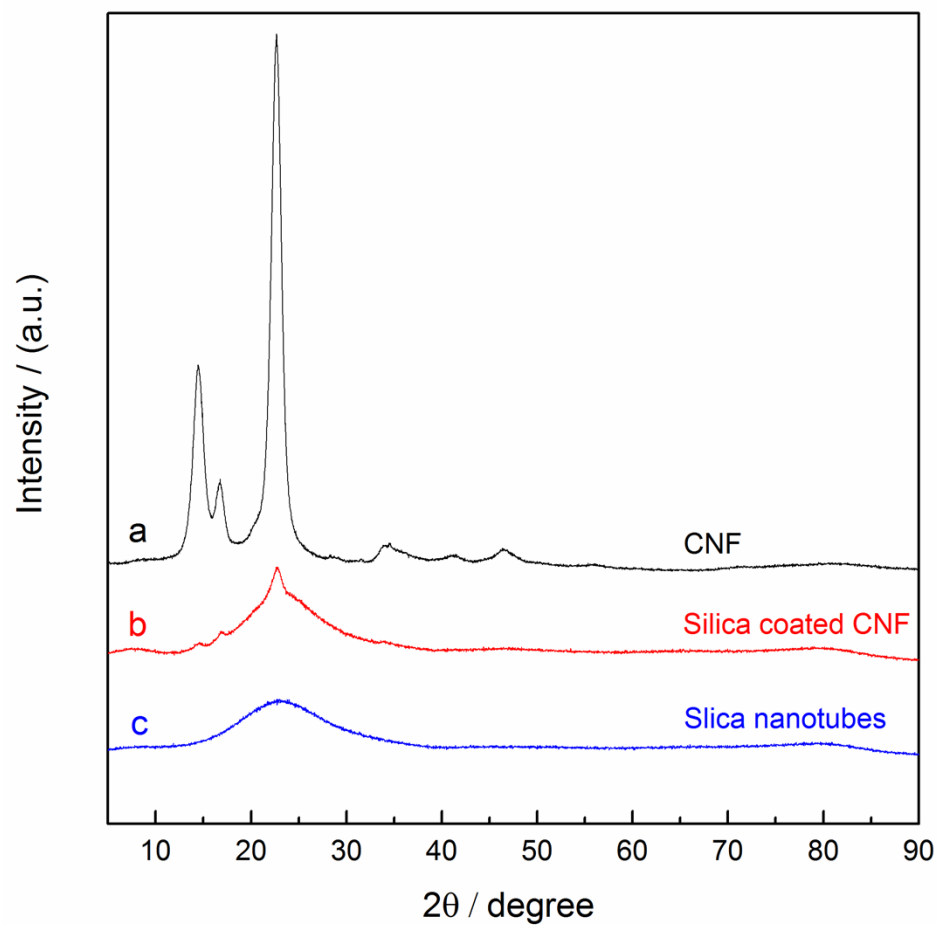

Fig. S3. X-ray diffraction of (a) CNF aerogels, (b) silica coated CNF aerogels, (c) silica coated CNF aerogels after burning at 400 °C for 6 h.
